# Supplementary material
Source: publisher figshare collection journal article supplement (https://gsajournals.figshare.com/ndownloader/files/25768502)
Supplement: Supplementary file 1 [file 25768502]

## Sheet: Sheet1
Table S2. Singer RoToR settings used for the experimental pipeline.
SETTINGS					384 Glycerol to 384 Plate	384 Plate to 384 Plate	384 Plate to 1536 Plate	1536 Plate to 1536 Plate	1536 Plate to 6144 Plate
Source					384 MTP	384 Agar	384 Agar	1536 Agar	1536 Agar
Target					384 Agar	384 Agar	1536 Agar	1536 Agar	6144 Agar
Pads					384 Long Pin	384 Short	384 Short	1536 Short	1536 Short
Program					Spot	Replicate	1:4 Array	Replicate	1:4 Array
	General
		Quantity			N/A	N/A	N/A	N/A	N/A
		Recycle			None	None	None	None	None
		Plate Protection			Uncheck	Uncheck	Uncheck	Uncheck	Uncheck
		Pairs
		Start Pair
	Source
		Offset				No Offset	Automatic	No Offset	Automatic
			Max Radius				0.4 mm		0.3 mm
		Offsets
		Pinning
			Pin Pressure			0.32	0.32	0.58	0.58
			Speed		19 mm per sec	19 mm per sec	19 mm per sec	19 mm per sec	19 mm per sec
			Backoff		0.5 mm	2 mm	2 mm	2.5 mm	2 mm
			Repeat Pin		1 times	1 times	1 times	1 times	1 times
		Dry Mix
			Clearance			0.5 mm	0.5 mm	0.5 mm	0.5 mm
			Diameter			1 mm	1 mm	1 mm	1 mm
			Cycles			1 rotations	1 rotations	1 rotations	1 rotations
		Wet Mix
			Diameter		1 mm
			Speed		25 mm per sec
			Cycles		3 rotations
			Travel		3
				2D/3D	3D
		Permanent Offset
	Target
		Pinning
			Pin Pressure		0.32	0.32	0.32	0.58	58%%
			Speed		19 mm per sec	19 mm per sec	19 mm per sec	19 mm per sec	19 mm per sec
			Backoff
			Overshoot		2 mm	2 mm	2 mm	2.5 mm	2 mm
			Repeat Pin		1 times	1 times	1 times	1 times	1 times
		Dry Mix
			Clearance		0.5 mm	0.5 mm	0.5 mm	0.4 mm	0.5 mm
			Diameter		1 mm	1 mm	1 mm	1 mm	1 mm
			Cycles		1 rotations	1 rotations	1 rotations	1 rotations	1 rotations
		Wet Mix
			Diameter
			Speed
			Cycles
			Travel
				2D/3D
	Pads
		Pressure
		Ejject Time
	Selected Options
		Recycle			Off	Off	Off	Off	Off
		Revist			Off	Off	Off	Off	Off
		Protect Source			Off	Off	Off	Off	Off
		Offset				Auto	Auto	Off	Off
		Source Mix			On	On	Off	Off	Off
		Target Mix			On	Off	Off	Off	Off
